# Supplementary material
Source: Springer Nature journal article supplement (https://www.springerprofessional.de/resource/supplementary/13638_2012_588_MOESM12_ESM.pdf/11898040)

Delay Distribution

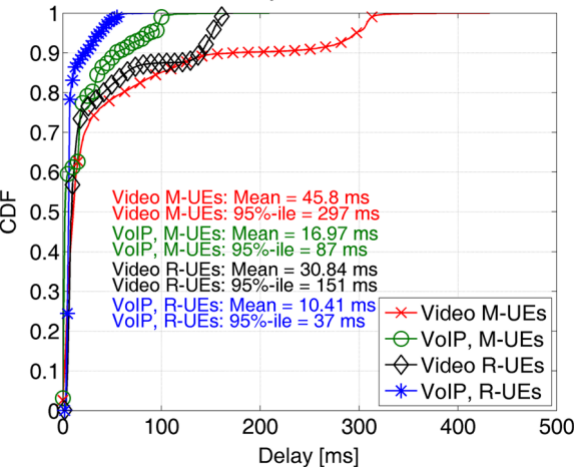

Supplement: MOESM12 [file 11898040]
